# Supplementary material for: Activation of butyrate-producing bacteria as well as bifidobacteria in the cat intestinal microbiota by the administration of 1-kestose, the smallest component of fructo-oligosaccharide
Source: PubMed Central journal article supplement — J Vet Med Sci. 2020 May 9;82(7):866–74. doi: 10.1292/jvms.19-0640 (PMC7399319; doi:10.1292/jvms.19-0640), 2020-05-09
Supplement: jvms-82-866-s001.pdf [file jvms-82-866-s001.pdf]

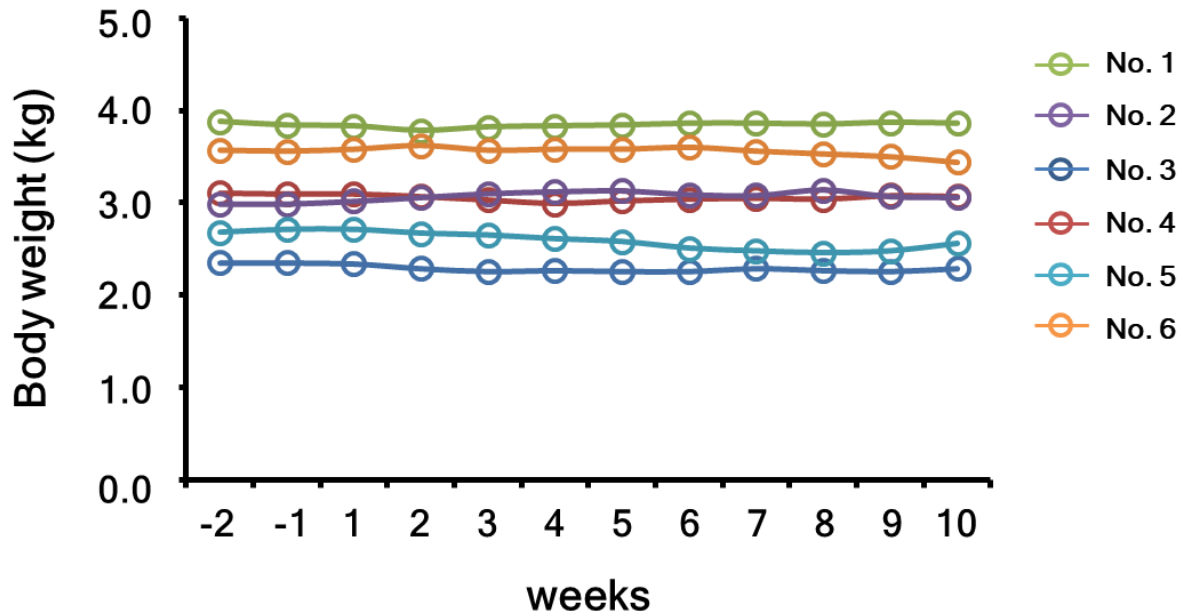

Supplemental Figure 1. Changes in body weight of cats

Supplemental Table 1. The hematology values of cats

| Parameter                               | Standard value | ID No. | 0 weeks | 4 weeks | 8 weeks | 10 weeks | Group |
|-----------------------------------------|----------------|--------|---------|---------|---------|----------|-------|
| White blood cells ( $10^2/\mu l$ )      | 55-195         | 1      | 62      | 65      | 59      | 70       | GA    |
|                                         |                | 2      | 101     | 92      | 96      | 80       |       |
|                                         |                | 3      | 68      | 57      | 79      | 75       | GB    |
|                                         |                | 4      | 89      | 88      | 81      | 106      |       |
|                                         |                | 5      | 93      | 92      | 87      | 77       |       |
|                                         |                | 6      | 99      | 81      | 85      | 135      |       |
| Red blood cells ( $\times 10^4/\mu l$ ) | 500-1000       | 1      | 936     | 942     | 970     | 950      | GA    |
|                                         |                | 2      | 1038    | 1027    | 1124    | 1077     |       |
|                                         |                | 3      | 874     | 769     | 770     | 742      | GB    |
|                                         |                | 4      | 958     | 841     | 860     | 826      |       |
|                                         |                | 5      | 782     | 802     | 842     | 702      |       |
|                                         |                | 6      | 995     | 902     | 935     | 910      |       |
| Hemoglobin (g/dl)                       | 8.0-15.0       | 1      | 12.1    | 12.0    | 12.4    | 11.6     | GA    |
|                                         |                | 2      | 14.0    | 13.4    | 14.4    | 13.6     |       |
|                                         |                | 3      | 12.6    | 11.2    | 10.7    | 9.6      | GB    |
|                                         |                | 4      | 12.5    | 10.9    | 11.4    | 10.7     |       |
|                                         |                | 5      | 11.3    | 11.9    | 12.1    | 9.8      |       |
|                                         |                | 6      | 14.1    | 13.5    | 14.1    | 13.2     |       |
| Hematocrit (%)                          | 24.0-45.0      | 1      | 36.2    | 36.4    | 37.6    | 35.0     | GA    |
|                                         |                | 2      | 42.5    | 42.8    | 45.6    | 41.9     |       |
|                                         |                | 3      | 40.4    | 35.8    | 33.3    | 30.1     | GB    |
|                                         |                | 4      | 37.7    | 33.6    | 34.9    | 32.6     |       |
|                                         |                | 5      | 39.3    | 40.9    | 41.7    | 34.3     |       |
|                                         |                | 6      | 43.7    | 41.7    | 44.6    | 41.1     |       |
| Platelets ( $\times 10^4/\mu l$ )       | 30.0-80.0      | 1      | 24.8    | 19.1    | 19.2    | 18.7     | GA    |
|                                         |                | 2      | 36.0    | 23.3    | 17.2    | 18.1     |       |
|                                         |                | 3      | 16.0    | ND      | 17.8    | 18.1     | GB    |
|                                         |                | 4      | 32.3    | 30.5    | 29.3    | 26.8     |       |
|                                         |                | 5      | 28.9    | 17.7    | 23.0    | 31.7     |       |
|                                         |                | 6      | 35.8    | 25.3    | 16.2    | 19.9     |       |

ND, not detected

Supplemental table 2. The blood chemistry values of the cats

| Parameter                 | Standard value | ID No. | 0 weeks | 4 weeks | 8 weeks | 10 weeks | Group |
|---------------------------|----------------|--------|---------|---------|---------|----------|-------|
| Triglyceride (mg/dl)      | 14-120         | 1      | 12      | 14      | 13      | 16       | GA    |
|                           |                | 2      | 17      | 21      | 16      | 18       |       |
|                           |                | 3      | 30      | 27      | 34      | 27       |       |
|                           |                | 4      | 21      | 22      | 29      | 30       | GB    |
|                           |                | 5      | 14      | 16      | 14      | 20       |       |
|                           |                | 6      | 16      | 18      | 16      | 16       |       |
| Total cholesterol (mg/dl) | 98-264         | 1      | 103     | 102     | 110     | 116      | GA    |
|                           |                | 2      | 102     | 98      | 105     | 116      |       |
|                           |                | 3      | 147     | 130     | 152     | 151      |       |
|                           |                | 4      | 146     | 134     | 150     | 157      | GB    |
|                           |                | 5      | 96      | 96      | 103     | 114      |       |
|                           |                | 6      | 80      | 76      | 81      | 89       |       |
| Blood glucose (mg/dl)     | 58-132         | 1      | 86      | 83      | 95      | 85       | GA    |
|                           |                | 2      | 89      | 125     | 116     | 134      |       |
|                           |                | 3      | 161     | 119     | 82      | 263      |       |
|                           |                | 4      | 86      | 98      | 94      | 130      | GB    |
|                           |                | 5      | 92      | 98      | 81      | 198      |       |
|                           |                | 6      | 71      | 95      | 88      | 83       |       |
| GOT (IU/l)                | 6-48           | 1      | 11      | 13      | 10      | 19       | GA    |
|                           |                | 2      | 12      | 9       | 7       | 7        |       |
|                           |                | 3      | 134     | 53      | 69      | 88       |       |
|                           |                | 4      | 22      | 21      | 24      | 21       | GB    |
|                           |                | 5      | 29      | 30      | 29      | 32       |       |
|                           |                | 6      | 16      | 15      | 21      | 16       |       |
| GPT (IU/l)                | 20-122         | 1      | 40      | 54      | 49      | 57       | GA    |
|                           |                | 2      | 46      | 44      | 37      | 38       |       |
|                           |                | 3      | 240     | 178     | 227     | 187      |       |
|                           |                | 4      | 44      | 45      | 54      | 43       | GB    |
|                           |                | 5      | 88      | 81      | 90      | 84       |       |
|                           |                | 6      | 58      | 75      | 84      | 69       |       |
| $\gamma$ -GTP (IU/l)      | 0-2            | 1      | 1       | 1       | 1       | 1        | GA    |
|                           |                | 2      | 1       | 1       | 1       | 1        |       |
|                           |                | 3      | 1       | 1       | 1       | 1        |       |
|                           |                | 4      | 1       | 1       | 1       | 1        | GB    |
|                           |                | 5      | 1       | 1       | 1       | 1        |       |
|                           |                | 6      | 1       | 1       | 1       | 1        |       |
| Bilirubin (mg/dl)         | 0.0-0.1        | 1      | 0.0     | 0.0     | 0.1     | 0.0      | GA    |
|                           |                | 2      | 0.0     | 0.0     | 0.0     | 0.0      |       |
|                           |                | 3      | 0.0     | 0.0     | 0.0     | 0.0      |       |
|                           |                | 4      | 0.0     | 0.0     | 0.0     | 0.0      | GB    |
|                           |                | 5      | 0.0     | 0.0     | 0.0     | 0.0      |       |
|                           |                | 6      | 0.0     | 0.0     | 0.0     | 0.0      |       |
| Total protein (g/dl)      | 6.1-8.4        | 1      | 7.1     | 7.1     | 7.6     | 7.6      | GA    |
|                           |                | 2      | 6.4     | 6.4     | 6.1     | 6.4      |       |
|                           |                | 3      | 6.6     | 6.4     | 7.3     | 6.4      |       |
|                           |                | 4      | 7.4     | 7.3     | 7.7     | 7.3      | GB    |
|                           |                | 5      | 6.2     | 6.3     | 6.7     | 6.2      |       |
|                           |                | 6      | 6.9     | 7.0     | 7.4     | 7.1      |       |
| Albumin (g/dl)            | 2.9-4.3        | 1      | 3.4     | 3.4     | 3.6     | 3.6      | GA    |
|                           |                | 2      | 3.3     | 3.3     | 3.2     | 3.4      |       |
|                           |                | 3      | 3.4     | 3.3     | 3.8     | 3.2      |       |
|                           |                | 4      | 3.4     | 3.4     | 3.5     | 3.4      | GB    |
|                           |                | 5      | 3.3     | 3.4     | 3.6     | 3.3      |       |
|                           |                | 6      | 3.5     | 3.5     | 3.7     | 3.5      |       |
| ALP (IU/l)                | 30-228         | 1      | 61      | 75      | 92      | 90       | GA    |
|                           |                | 2      | 85      | 142     | 123     | 133      |       |
|                           |                | 3      | 81      | 75      | 82      | 92       |       |
|                           |                | 4      | 71      | 61      | 67      | 71       | GB    |
|                           |                | 5      | 66      | 71      | 72      | 79       |       |
|                           |                | 6      | 36      | 50      | 42      | 39       |       |
| Urea nitrogen (mg/dl)     | 17-40          | 1      | 28      | 25      | 27      | 28       | GA    |
|                           |                | 2      | 18      | 14      | 19      | 18       |       |
|                           |                | 3      | 32      | 25      | 37      | 31       |       |
|                           |                | 4      | 24      | 24      | 26      | 25       | GB    |
|                           |                | 5      | 27      | 25      | 29      | 27       |       |
|                           |                | 6      | 24      | 23      | 26      | 24       |       |
| Creatinine (mg/dl)        | 0.8-2.2        | 1      | 1.2     | 1.2     | 1.2     | 1.3      | GA    |
|                           |                | 2      | 0.7     | 0.6     | 0.7     | 0.7      |       |
|                           |                | 3      | 1.3     | 1.2     | 1.3     | 1.3      |       |
|                           |                | 4      | 1.0     | 1.0     | 1.0     | 1.1      | GB    |
|                           |                | 5      | 1.3     | 1.2     | 1.1     | 1.2      |       |
|                           |                | 6      | 1.3     | 1.2     | 1.1     | 1.2      |       |
| Na (mmol/l)               | 148-155        | 1      | 154     | 153     | 153     | 156      | GA    |
|                           |                | 2      | 153     | 154     | 154     | 159      |       |
|                           |                | 3      | 155     | 156     | 157     | 152      |       |
|                           |                | 4      | 153     | 153     | 153     | 151      | GB    |
|                           |                | 5      | 156     | 154     | 158     | 154      |       |
|                           |                | 6      | 156     | 156     | 159     | 156      |       |
| K (mmol/l)                | 3.5-5.2        | 1      | 4.4     | 4.3     | 3.9     | 4.6      | GA    |
|                           |                | 2      | 4.6     | 4.2     | 4.1     | 4.2      |       |
|                           |                | 3      | 4.2     | 3.7     | 4.5     | 4.5      |       |
|                           |                | 4      | 4.6     | 4.5     | 4.4     | 4.7      | GB    |
|                           |                | 5      | 4.8     | 4.4     | 4.8     | 4.1      |       |
|                           |                | 6      | 4.2     | 3.8     | 4.5     | 3.8      |       |
| Cl (mmol/l)               | 115-124        | 1      | 122     | 120     | 121     | 124      | GA    |
|                           |                | 2      | 122     | 120     | 121     | 125      |       |
|                           |                | 3      | 123     | 119     | 123     | 122      |       |
|                           |                | 4      | 123     | 120     | 122     | 123      | GB    |
|                           |                | 5      | 123     | 123     | 126     | 124      |       |
|                           |                | 6      | 124     | 123     | 125     | 125      |       |
| Mg (mg/dl)                | 2.2-2.9        | 1      | 2.2     | 2.2     | 2.3     | 2.2      | GA    |
|                           |                | 2      | 2.3     | 2.4     | 2.3     | 2.4      |       |
|                           |                | 3      | 1.9     | 1.9     | 2.0     | 2.0      |       |
|                           |                | 4      | 2.3     | 2.3     | 2.4     | 2.3      | GB    |
|                           |                | 5      | 2.2     | 2.2     | 2.3     | 2.2      |       |
|                           |                | 6      | 2.4     | 2.3     | 2.5     | 2.3      |       |
| Ca (mg/dl)                | 9.0-11.2       | 1      | 9.1     | 8.8     | 9.0     | 8.9      | GA    |
|                           |                | 2      | 8.9     | 8.8     | 8.9     | 9.0      |       |
|                           |                | 3      | 9.3     | 9.5     | 10.4    | 8.7      |       |
|                           |                | 4      | 9.2     | 9.2     | 9.2     | 9.0      | GB    |
|                           |                | 5      | 9.4     | 10.3    | 10.0    | 9.0      |       |
|                           |                | 6      | 10.0    | 9.9     | 10.7    | 9.8      |       |
| P (mg/dl)                 | 2.6-6.2        | 1      | 4.7     | 4.6     | 4.9     | 4.9      | GA    |
|                           |                | 2      | 4.3     | 3.7     | 4.4     | 4.6      |       |
|                           |                | 3      | 5.4     | 4.4     | 5.9     | 4.4      |       |
|                           |                | 4      | 4.1     | 4.3     | 4.2     | 4.6      | GB    |
|                           |                | 5      | 4.0     | 5.7     | 5.3     | 3.9      |       |
|                           |                | 6      | 5.1     | 4.7     | 4.9     | 4.9      |       |

Supplemental table 3. Intestinal microbiota composition analysis at the phylum level in GA

| Phylum          | Average abundance (%) (Minimum% - Max%) |                            |                            |                            |
|-----------------|-----------------------------------------|----------------------------|----------------------------|----------------------------|
|                 | 0 weeks                                 | 4 weeks                    | 8 weeks                    | 10 weeks                   |
| Firmicutes      | 62.43<br>( 57.52 - 67.33 )              | 63.41<br>( 60.16 - 66.66 ) | 58.50<br>( 45.19 - 71.82 ) | 62.19<br>( 43.52 - 80.86 ) |
| Actinobacteria  | 8.13<br>( 7.74 - 8.52 )                 | 10.53<br>( 8.73 - 12.32 )  | 16.62<br>( 11.13 - 22.12 ) | 8.12<br>( 6.99 - 9.26 )    |
| Bacteroidetes   | 9.08<br>( 4.97 - 13.19 )                | 5.32<br>( 5.09 - 5.55 )    | 3.02<br>( 2.70 - 3.33 )    | 9.02<br>( 1.55 - 16.49 )   |
| Proteobacteria  | 0.56<br>( 0.36 - 0.77 )                 | 0.43<br>( 0.32 - 0.54 )    | 0.22<br>( 0.21 - 0.22 )    | 1.01<br>( 0.08 - 1.95 )    |
| Fusobacteria    | 0.18<br>( 0.04 - 0.31 )                 | 0.01<br>( 0.01 - 0.02 )    | 0.02<br>( 0.01 - 0.02 )    | 0.17<br>( 0.03 - 0.31 )    |
| Verrucomicrobia | 0.02<br>( 0.02 - 0.02 )                 | 0.01<br>( 0.01 - 0.01 )    | 0.02<br>( 0.01 - 0.03 )    | 0.03<br>( 0.02 - 0.04 )    |

Supplemental table 4. Intestinal microbiota composition analysis at the phylum level in GB

| Phylum          | Average abundance (%) (Minimum% - Max%) |                            |                            |                            |
|-----------------|-----------------------------------------|----------------------------|----------------------------|----------------------------|
|                 | 0 weeks                                 | 4 weeks                    | 8 weeks                    | 10 weeks                   |
| Firmicutes      | 45.32<br>( 43.33 - 47.57 )              | 37.99<br>( 32.20 - 47.30 ) | 39.68<br>( 34.04 - 45.65 ) | 42.42<br>( 35.26 - 48.40 ) |
| Actinobacteria  | 14.80<br>( 9.61 - 21.46 )               | 21.17<br>( 9.16 - 46.00 )  | 22.58<br>( 11.77 - 34.72 ) | 9.57<br>( 4.50 - 19.36 )   |
| Bacteroidetes   | 9.19<br>( 6.26 - 14.68 )                | 12.29<br>( 3.94 - 17.27 )  | 9.65<br>( 5.95 - 12.48 )   | 14.98<br>( 6.72 - 20.21 )  |
| Proteobacteria  | 0.47<br>( 0.25 - 0.72 )                 | 0.92<br>( 0.24 - 1.28 )    | 0.70<br>( 0.22 - 1.12 )    | 1.08<br>( 0.38 - 1.48 )    |
| Fusobacteria    | 0.13<br>( 0.03 - 0.31 )                 | 0.30<br>( 0.04 - 0.47 )    | 0.17<br>( 0.04 - 0.31 )    | 0.48<br>( 0.06 - 0.64 )    |
| Verrucomicrobia | 0.07<br>( 0.03 - 0.16 )                 | 0.04<br>( 0.02 - 0.06 )    | 0.04<br>( 0.02 - 0.04 )    | 0.06<br>( 0.03 - 0.12 )    |

Supplemental table 5. Intestinal microbiota composition analysis at the genus level in GA

| Genus                        | Average abundance (%) (Minimum% - Max%) |                            |                            |                            |
|------------------------------|-----------------------------------------|----------------------------|----------------------------|----------------------------|
|                              | 0 weeks                                 | 4 weeks                    | 8 weeks                    | 10 weeks                   |
| <i>Lactobacillus</i>         | 35.44<br>( 27.67 - 43.21 )              | 38.37<br>( 28.48 - 48.25 ) | 28.59<br>( 17.67 - 39.51 ) | 31.69<br>( 10.67 - 52.72 ) |
| <i>Blautia</i>               | 11.82<br>( 11.60 - 12.05 )              | 8.84<br>( 6.86 - 10.81 )   | 8.74<br>( 7.14 - 10.35 )   | 14.26<br>( 11.77 - 16.76 ) |
| <i>Collinsella</i>           | 7.54<br>( 7.08 - 8.00 )                 | 7.87<br>( 6.83 - 8.91 )    | 9.49<br>( 7.68 - 11.29 )   | 7.36<br>( 6.46 - 8.26 )    |
| <i>Prevotella</i>            | 8.57<br>( 4.11 - 13.03 )                | 5.06<br>( 4.80 - 5.31 )    | 2.77<br>( 2.51 - 3.04 )    | 8.18<br>( 1.49 - 14.88 )   |
| <i>Clostridium hiranonis</i> | 5.98<br>( 5.81 - 6.16 )                 | 5.00<br>( 4.80 - 5.20 )    | 4.45<br>( 3.96 - 4.95 )    | 8.08<br>( 7.15 - 9.02 )    |
| <i>Megasphaera</i>           | 5.21<br>( 1.01 - 9.40 )                 | 7.12<br>( 2.98 - 11.27 )   | 5.50<br>( 2.27 - 8.74 )    | 3.00<br>( 0.63 - 5.36 )    |
| <i>Bifidobacterium</i>       | 0.34<br>( 0.31 - 0.38 )                 | 2.4<br>( 1.59 - 3.12 )     | 6.8<br>( 3.05 - 10.55 )    | 0.4<br>( 0.27 - 0.51 )     |
| <i>Streptococcus</i>         | 0.05<br>( 0.05 - 0.06 )                 | 0.07<br>( 0.04 - 0.10 )    | 7.35<br>( 0.27 - 14.43 )   | 0.07<br>( 0.06 - 0.08 )    |
| <i>Turicibacter</i>          | 0.00<br>( 0.00 - 0.00 )                 | 0.00<br>( 0.00 - 0.00 )    | 0.00<br>( 0.00 - 0.00 )    | 0.06<br>( 0.00 - 0.11 )    |
| <i>Lachnoclostridium</i>     | 0.53<br>( 0.27 - 0.79 )                 | 0.55<br>( 0.48 - 0.63 )    | 0.50<br>( 0.36 - 0.63 )    | 0.56<br>( 0.26 - 0.87 )    |
| <i>Faecalibacterium</i>      | 0.93<br>( 0.91 - 0.96 )                 | 0.46<br>( 0.44 - 0.49 )    | 0.32<br>( 0.17 - 0.47 )    | 1.08<br>( 0.40 - 1.75 )    |
| <i>Ruminococcus</i>          | 0.51<br>( 0.32 - 0.71 )                 | 0.34<br>( 0.26 - 0.41 )    | 0.45<br>( 0.24 - 0.66 )    | 1.17<br>( 0.59 - 1.74 )    |
| <i>Subdoligranulum</i>       | 0.51<br>( 0.23 - 0.78 )                 | 0.31<br>( 0.18 - 0.43 )    | 0.57<br>( 0.40 - 0.74 )    | 0.20<br>( 0.12 - 0.27 )    |
| <i>Megamonas</i>             | 0.25<br>( 0.12 - 0.37 )                 | 0.30<br>( 0.26 - 0.35 )    | 0.11<br>( 0.03 - 0.19 )    | 0.10<br>( 0.02 - 0.18 )    |
| <i>Paeniclostridium</i>      | 0.01<br>( 0.00 - 0.02 )                 | 0.15<br>( 0.13 - 0.16 )    | 0.07<br>( 0.03 - 0.11 )    | 0.01<br>( 0.00 - 0.02 )    |
| <i>Slackia</i>               | 0.17<br>( 0.14 - 0.19 )                 | 0.17<br>( 0.16 - 0.19 )    | 0.24<br>( 0.19 - 0.28 )    | 0.24<br>( 0.18 - 0.30 )    |
| <i>Tyzzera</i>               | 0.18<br>( 0.03 - 0.33 )                 | 0.10<br>( 0.04 - 0.15 )    | 0.12<br>( 0.00 - 0.24 )    | 0.36<br>( 0.03 - 0.69 )    |
| <i>Bacteroides</i>           | 0.33<br>( 0.05 - 0.60 )                 | 0.13<br>( 0.12 - 0.14 )    | 0.06<br>( 0.06 - 0.07 )    | 0.56<br>( 0.01 - 1.11 )    |
| <i>Desulfovibrio</i>         | 0.22<br>( 0.09 - 0.35 )                 | 0.15<br>( 0.15 - 0.15 )    | 0.08<br>( 0.07 - 0.10 )    | 0.42<br>( 0.04 - 0.80 )    |
| <i>Enterococcus</i>          | 0.14<br>( 0.09 - 0.18 )                 | 0.10<br>( 0.03 - 0.18 )    | 0.02<br>( 0.02 - 0.03 )    | 0.46<br>( 0.07 - 0.86 )    |
| <i>Clostridium</i>           | 0.03<br>( 0.02 - 0.04 )                 | 0.48<br>( 0.06 - 0.91 )    | 0.21<br>( 0.15 - 0.27 )    | 0.36<br>( 0.02 - 0.69 )    |
| <i>Parabacteroides</i>       | 0.12<br>( 0.07 - 0.16 )                 | 0.09<br>( 0.03 - 0.16 )    | 0.08<br>( 0.03 - 0.13 )    | 0.09<br>( 0.04 - 0.13 )    |
| <i>Fusobacterium</i>         | 0.18<br>( 0.04 - 0.31 )                 | 0.01<br>( 0.01 - 0.01 )    | 0.01<br>( 0.01 - 0.02 )    | 0.16<br>( 0.03 - 0.29 )    |
| <i>Lactonifactor</i>         | 0.11<br>( 0.03 - 0.19 )                 | 0.17<br>( 0.09 - 0.26 )    | 0.35<br>( 0.21 - 0.48 )    | 0.05<br>( 0.03 - 0.06 )    |
| <i>Paraprevotella</i>        | 0.02<br>( 0.01 - 0.03 )                 | 0.02<br>( 0.00 - 0.05 )    | 0.03<br>( 0.01 - 0.06 )    | 0.15<br>( 0.00 - 0.29 )    |
| <i>Anaerobiospirillum</i>    | 0.07<br>( 0.00 - 0.14 )                 | 0.08<br>( 0.00 - 0.15 )    | 0.05<br>( 0.00 - 0.09 )    | 0.35<br>( 0.00 - 0.70 )    |
| <i>Butyricoccus</i>          | 0.18<br>( 0.13 - 0.23 )                 | 0.15<br>( 0.12 - 0.18 )    | 0.11<br>( 0.09 - 0.13 )    | 0.11<br>( 0.04 - 0.18 )    |
| <i>Catenibacterium</i>       | 0.16<br>( 0.07 - 0.25 )                 | 0.15<br>( 0.08 - 0.21 )    | 0.09<br>( 0.03 - 0.15 )    | 0.13<br>( 0.08 - 0.19 )    |
| <i>Sutterella</i>            | 0.23<br>( 0.22 - 0.24 )                 | 0.12<br>( 0.09 - 0.15 )    | 0.05<br>( 0.03 - 0.08 )    | 0.18<br>( 0.01 - 0.35 )    |
| <i>Alistipes</i>             | 0.03<br>( 0.01 - 0.06 )                 | 0.02<br>( 0.02 - 0.02 )    | 0.05<br>( 0.03 - 0.07 )    | 0.04<br>( 0.00 - 0.07 )    |
| <i>Adlercreutzia</i>         | 0.03<br>( 0.03 - 0.04 )                 | 0.05<br>( 0.04 - 0.07 )    | 0.05<br>( 0.02 - 0.07 )    | 0.06<br>( 0.03 - 0.08 )    |
| <i>Allisonella</i>           | 0.10<br>( 0.02 - 0.19 )                 | 0.18<br>( 0.15 - 0.21 )    | 0.18<br>( 0.02 - 0.35 )    | 0.12<br>( 0.06 - 0.18 )    |
| <i>Actinomyces</i>           | 0.02<br>( 0.02 - 0.02 )                 | 0.03<br>( 0.02 - 0.04 )    | 0.02<br>( 0.02 - 0.03 )    | 0.03<br>( 0.02 - 0.04 )    |
| <i>Acidaminococcus</i>       | 0.01<br>( 0.00 - 0.02 )                 | 0.23<br>( 0.00 - 0.46 )    | 0.51<br>( 0.00 - 1.03 )    | 0.00<br>( 0.00 - 0.00 )    |

Supplemental table 6. Intestinal microbiota composition analysis at the genus level in GB

| Genus                        | Average abundance (%) (Minimum% - Max%) |                            |                           |                            |
|------------------------------|-----------------------------------------|----------------------------|---------------------------|----------------------------|
|                              | 0 weeks                                 | 4 weeks                    | 8 weeks                   | 10 weeks                   |
| <i>Lactobacillus</i>         | 0.09<br>( 0.04 - 0.20 )                 | 2.44<br>( 0.09 - 8.58 )    | 0.43<br>( 0.10 - 0.89 )   | 0.06<br>( 0.04 - 0.07 )    |
| <i>Blautia</i>               | 18.08<br>( 14.06 - 22.05 )              | 13.95<br>( 9.95 - 19.02 )  | 16.49<br>( 10.73 - 19.3 ) | 18.36<br>( 16.01 - 22.62 ) |
| <i>Collinsella</i>           | 10.39<br>( 8.66 - 12.58 )               | 12.96<br>( 7.78 - 18.44 )  | 15.55<br>( 9.60 - 21.90 ) | 7.67<br>( 3.97 - 13.72 )   |
| <i>Prevotella</i>            | 8.04<br>( 4.981 - 13.55 )               | 11.24<br>( 3.811 - 15.52 ) | 8.68<br>( 5.605 - 11.01 ) | 13.67<br>( 4.869 - 19.29 ) |
| <i>Clostridium hiranonis</i> | 11.19<br>( 4.27 - 17.82 )               | 6.57<br>( 3.03 - 8.87 )    | 8.42<br>( 3.73 - 13.35 )  | 10.77<br>( 8.94 - 11.99 )  |
| <i>Megasphaera</i>           | 1.69<br>( 0.11 - 5.03 )                 | 2.96<br>( 0.631 - 5.642 )  | 6.13<br>( 3.207 - 12.02 ) | 0.21<br>( 0.014 - 0.569 )  |
| <i>Bifidobacterium</i>       | 3.38<br>( 0.17 - 8.06 )                 | 7.60<br>( 0.16 - 26.85 )   | 6.38<br>( 1.33 - 20.60 )  | 1.00<br>( 0.07 - 3.54 )    |
| <i>Streptococcus</i>         | 0.24<br>( 0.08 - 0.49 )                 | 3.93<br>( 0.07 - 15.35 )   | 1.65<br>( 0.05 - 6.34 )   | 4.12<br>( 0.11 - 15.94 )   |
| <i>Turicibacter</i>          | 7.30<br>( 0.00 - 17.27 )                | 2.08<br>( 0.00 - 8.18 )    | 0.57<br>( 0.00 - 2.26 )   | 2.63<br>( 0.00 - 10.51 )   |
| <i>Lachnoclostridium</i>     | 1.42<br>( 1.20 - 1.68 )                 | 0.93<br>( 0.45 - 1.22 )    | 0.82<br>( 0.38 - 1.03 )   | 1.05<br>( 0.76 - 1.34 )    |
| <i>Faecalibacterium</i>      | 0.56<br>( 0.16 - 1.17 )                 | 0.73<br>( 0.18 - 1.38 )    | 0.56<br>( 0.08 - 1.15 )   | 0.83<br>( 0.09 - 1.33 )    |
| <i>Ruminococcus</i>          | 0.85<br>( 0.61 - 1.34 )                 | 0.44<br>( 0.34 - 0.60 )    | 0.42<br>( 0.21 - 0.62 )   | 0.85<br>( 0.58 - 1.05 )    |
| <i>Subdoligranulum</i>       | 1.11<br>( 0.12 - 2.49 )                 | 0.38<br>( 0.10 - 0.89 )    | 0.53<br>( 0.17 - 0.91 )   | 0.26<br>( 0.07 - 0.71 )    |
| <i>Megamonas</i>             | 0.04<br>( 0.01 - 0.07 )                 | 1.66<br>( 0.01 - 4.64 )    | 1.40<br>( 0.19 - 3.66 )   | 0.06<br>( 0.00 - 0.21 )    |
| <i>Paeniclostridium</i>      | 1.07<br>( 0.36 - 1.85 )                 | 0.20<br>( 0.00 - 0.65 )    | 0.69<br>( 0.25 - 1.30 )   | 0.87<br>( 0.00 - 2.43 )    |
| <i>Slackia</i>               | 0.68<br>( 0.48 - 0.85 )                 | 0.40<br>( 0.27 - 0.54 )    | 0.38<br>( 0.24 - 0.47 )   | 0.67<br>( 0.28 - 1.79 )    |
| <i>Tyzzerella</i>            | 0.23<br>( 0.14 - 0.40 )                 | 0.37<br>( 0.01 - 0.77 )    | 0.42<br>( 0.01 - 1.04 )   | 0.83<br>( 0.73 - 0.99 )    |
| <i>Bacteroides</i>           | 0.29<br>( 0.23 - 0.39 )                 | 0.32<br>( 0.06 - 0.63 )    | 0.29<br>( 0.07 - 0.51 )   | 0.56<br>( 0.17 - 1.33 )    |
| <i>Desulfovibrio</i>         | 0.20<br>( 0.11 - 0.43 )                 | 0.39<br>( 0.02 - 0.64 )    | 0.32<br>( 0.08 - 0.61 )   | 0.73<br>( 0.15 - 0.95 )    |
| <i>Enterococcus</i>          | 0.34<br>( 0.03 - 1.02 )                 | 0.00<br>( 0.00 - 0.01 )    | 0.06<br>( 0.01 - 0.17 )   | 0.33<br>( 0.03 - 0.57 )    |
| <i>Clostridium</i>           | 0.31<br>( 0.01 - 0.67 )                 | 0.15<br>( 0.00 - 0.27 )    | 0.20<br>( 0.02 - 0.40 )   | 0.20<br>( 0.01 - 0.67 )    |
| <i>Parabacteroides</i>       | 0.27<br>( 0.15 - 0.45 )                 | 0.29<br>( 0.02 - 0.52 )    | 0.24<br>( 0.07 - 0.38 )   | 0.25<br>( 0.16 - 0.36 )    |
| <i>Fusobacterium</i>         | 0.12<br>( 0.03 - 0.30 )                 | 0.29<br>( 0.03 - 0.46 )    | 0.16<br>( 0.04 - 0.31 )   | 0.48<br>( 0.04 - 0.64 )    |
| <i>Lactonifactor</i>         | 0.12<br>( 0.02 - 0.28 )                 | 0.23<br>( 0.02 - 0.71 )    | 0.22<br>( 0.02 - 0.75 )   | 0.25<br>( 0.02 - 0.89 )    |
| <i>Paraprevotella</i>        | 0.23<br>( 0.09 - 0.54 )                 | 0.24<br>( 0.02 - 0.51 )    | 0.27<br>( 0.12 - 0.64 )   | 0.34<br>( 0.06 - 0.68 )    |
| <i>Anaerobiospirillum</i>    | 0.06<br>( 0.01 - 0.13 )                 | 0.32<br>( 0.00 - 0.55 )    | 0.22<br>( 0.00 - 0.46 )   | 0.22<br>( 0.06 - 0.44 )    |
| <i>Butyricoccus</i>          | 0.12<br>( 0.03 - 0.26 )                 | 0.18<br>( 0.03 - 0.27 )    | 0.10<br>( 0.07 - 0.12 )   | 0.17<br>( 0.05 - 0.27 )    |
| <i>Catenibacterium</i>       | 0.06<br>( 0.01 - 0.08 )                 | 0.25<br>( 0.08 - 0.47 )    | 0.06<br>( 0.02 - 0.12 )   | 0.09<br>( 0.01 - 0.12 )    |
| <i>Sutterella</i>            | 0.05<br>( 0.02 - 0.07 )                 | 0.12<br>( 0.00 - 0.30 )    | 0.08<br>( 0.00 - 0.20 )   | 0.03<br>( 0.02 - 0.04 )    |
| <i>Alistipes</i>             | 0.25<br>( 0.09 - 0.36 )                 | 0.08<br>( 0.01 - 0.16 )    | 0.08<br>( 0.04 - 0.13 )   | 0.09<br>( 0.03 - 0.19 )    |
| <i>Adlercreutzia</i>         | 0.13<br>( 0.09 - 0.16 )                 | 0.11<br>( 0.05 - 0.18 )    | 0.11<br>( 0.06 - 0.19 )   | 0.13<br>( 0.11 - 0.15 )    |
| <i>Allisonella</i>           | 0.02<br>( 0.00 - 0.03 )                 | 0.09<br>( 0.07 - 0.11 )    | 0.12<br>( 0.01 - 0.21 )   | 0.04<br>( 0.00 - 0.10 )    |
| <i>Actinomyces</i>           | 0.14<br>( 0.09 - 0.23 )                 | 0.05<br>( 0.02 - 0.09 )    | 0.09<br>( 0.05 - 0.15 )   | 0.05<br>( 0.02 - 0.09 )    |
| <i>Acidaminococcus</i>       | 0.00<br>( 0.00 - 0.01 )                 | 0.06<br>( 0.00 - 0.23 )    | 0.11<br>( 0.00 - 0.42 )   | 0.00<br>( 0.00 - 0.00 )    |
